# Supplementary material for: Efficient Cationization of Cotton for Salt-Free Dyeing by Adjusting Fiber Crystallinity through Alcohol-Water-NaOH Pretreatment
Source: MDPI journal article supplement (doi:10.3390/polym14245546), 2022-12-18
Supplement: s1 [file s1]

## Supplementary Information

### Efficient Cationization of Cotton for Salt-Free Dyeing by Adjusting fiber Crystallinity through Alcohol-Water-NaOH Pretreatment

Aini Wu, Wei Ma\*, Zhiyu Yang, Shufen Zhang

State Key Laboratory of Fine Chemicals, Frontier Science Center for Smart Materials,  
School of Chemical Engineering, Dalian University of Technology,  
Dalian 116023, China

Correspondence: weima@dlut.edu.cn; Tel.: +86-411-84986265

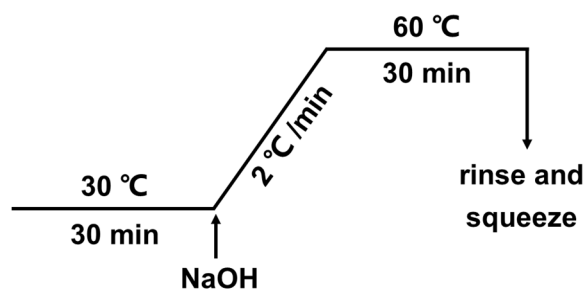

**Figure S1.** Schematic diagram of the cationization process

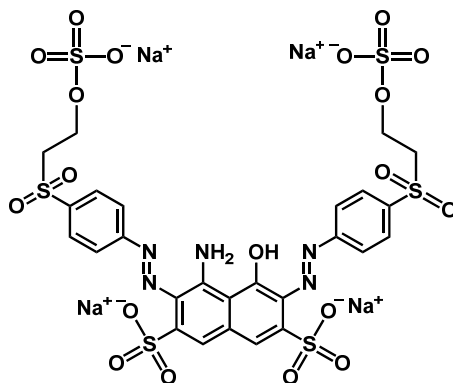

**Figure S2.** Chemical structure of C. I. Reactive Black 5

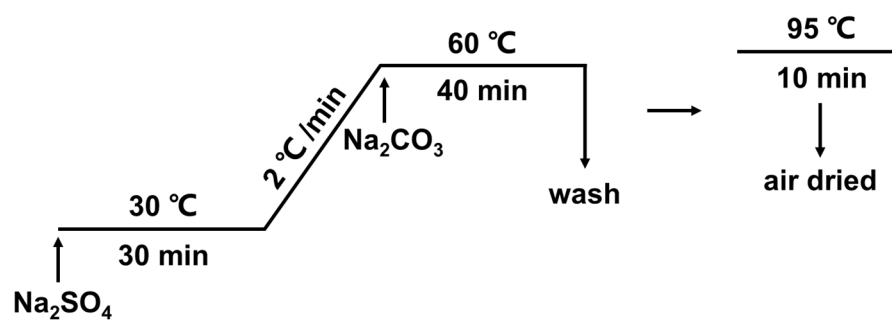

**Figure S3.** Schematic diagram of the conventional dyeing and soaping process

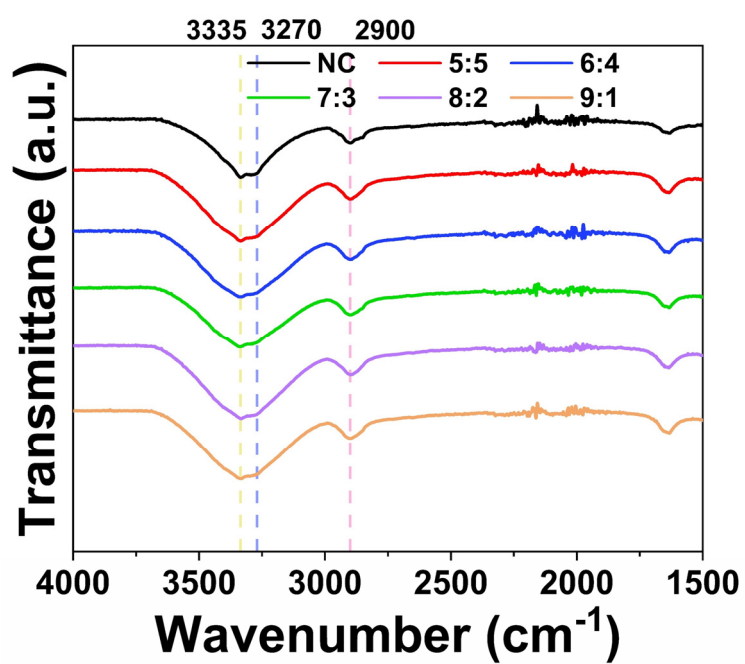

**Figure S4.** Partial enlargement of Figure 6a

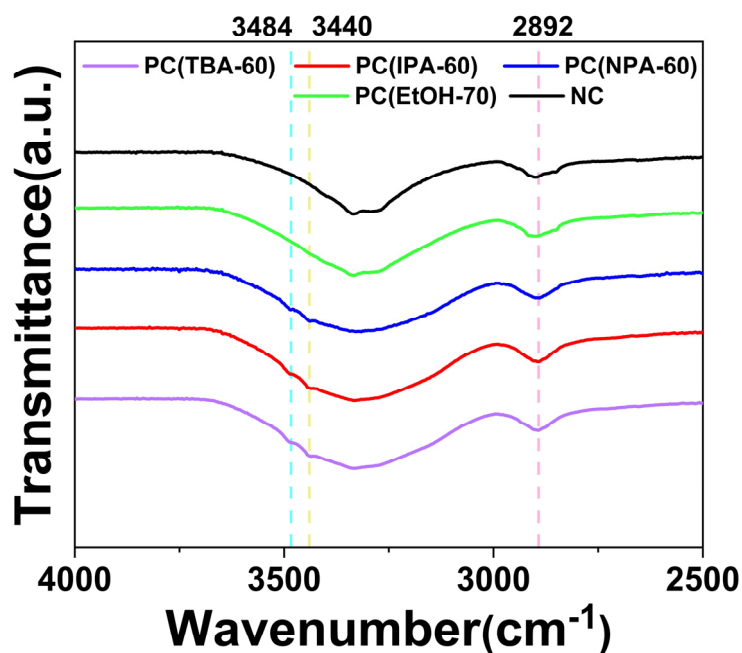

**Figure S5.** Partial enlargement of Figure 6b

**Table S1.** Cationic reagent dosage comparison between different references

| Cationic agent | Amount (liquid ratio) | Reactive dye usage | Results of salt-free dyeing | References                      |
|----------------|-----------------------|--------------------|-----------------------------|---------------------------------|
| GTA            | 60 g/L (1:20)         | 2% (o.w.f)         | F%: 96.74%                  | Ma, W.; et al. (2017)           |
| CHPTAC         | 37.5 g/L (Pad-batch)  | 1.13% (o.w.f.)     | E%: >90%                    | Patiño, A.; et al. (2011)       |
| CHPTAC         | 80 g/L (1:6)          | 9.95% (o.w.f)      | F%: 58.2%                   | Arivithamani, N.; et al. (2018) |
| CHPTAC         | 30 g/L (1:20)         | 2% (o.w.f)         | E%: 87.68%                  | Zhang, T.; et al. (2021)        |
| CHPTAC         | 17.5 g/L (1:17)       | 1.75% (o.w.f)      | E%: 95%                     | Acharya, S.; et al. (2014)      |
| CHPTAC         | 40 g/L (1:6)          | 1% (o.w.f)         | E%: 93.64%                  | Arivithamani, N.; et al. (2016) |
| GTA            | 30 g/L (1:3)          | 6% (o.w.f)         | F%: 95.95%                  | This work                       |

In the listed literatures, when the dye dosage was 1% (o.w.f) to 2% (o.w.f), the required cationic reagent for cationization ranged from 17.5 g/L to 60 g/L, i.e., 0.3 g to 1.2 g of cationic reagent usage per gram of fiber, realizing a dye fixation of higher than

87.68% for salt-free dyeing. Besides, when the dye usage was 9.95% (o.w.f), the cationic reagent addition was 80 g/L, that is, the quantity of the agent consumed was 0.48 g per gram of fiber, achieving a dye fixation of 58.2%.
